# Supplementary material
Source: MDPI journal article supplement (https://www.mdpi.com/2079-6447/2/1/8)
Supplement: s1 [file s1]

## Supplementary Materials

### Photocatalytic Properties of $\text{PbMoO}_4$ Nanocrystals against Cationic and Anionic Dyes in Several Experimental Conditions

**Francisco Nobre <sup>1,\*</sup>, Jairo Trindade <sup>2</sup>, Marcus do Nascimento <sup>1</sup>, Giancarlo Souza <sup>2</sup>, Otoniel Mendes <sup>3</sup>, Anderson Albuquerque <sup>4,5</sup>, Júlio Sambrano <sup>5</sup>, Paulo Couceiro <sup>6</sup>, Walter Brito <sup>7</sup>, Yurimiler Ruiz <sup>8</sup> and José Matos <sup>2</sup>**

<sup>1</sup> Instituto Federal de Educação, Ciência e Tecnologia do Amazonas, Campus Manaus Centro, IFAM-CMC-AM, Manaus CEP 69020-120, AM, Brazil

<sup>2</sup> Laboratório Interdisciplinar de Materiais Avançados, LIMAV-UFPI, Universidade Federal do Piauí, Teresina CEP 69049-550, PI, Brazil

<sup>3</sup> Universidade do Estado do Amazonas (LabFENTOM), Manaus CEP 69050-020, AM, Brazil

<sup>4</sup> Instituto de Química, Universidade Federal do Rio Grande do Norte (UFRN), Natal CEP 59078-970, RN, Brazil

<sup>5</sup> Grupo de Modelagem e Simulação Molecular, INCTMN-UNESP, São Paulo State University, Bauru CEP 17033-360, SP, Brazil

<sup>6</sup> Laboratório de Físico-Química, LFQ-UFAM, Universidade Federal do Amazonas, Manaus CEP 69077-000, AM, Brazil

<sup>7</sup> Laboratório de Bioeletrônica e Eletroanalítica (LABEL), Universidade Federal do Amazonas, Manaus CEP 69077-000, AM, Brazil

<sup>8</sup> Departamento de Engenharia de Materiais, Universidade Federal do Amazonas, Manaus CEP 69077-000, AM, Brazil

\* Correspondence: francisco.nobre@ifam.edu.br; Tel.: +55-92984463086

## Chapter Figure

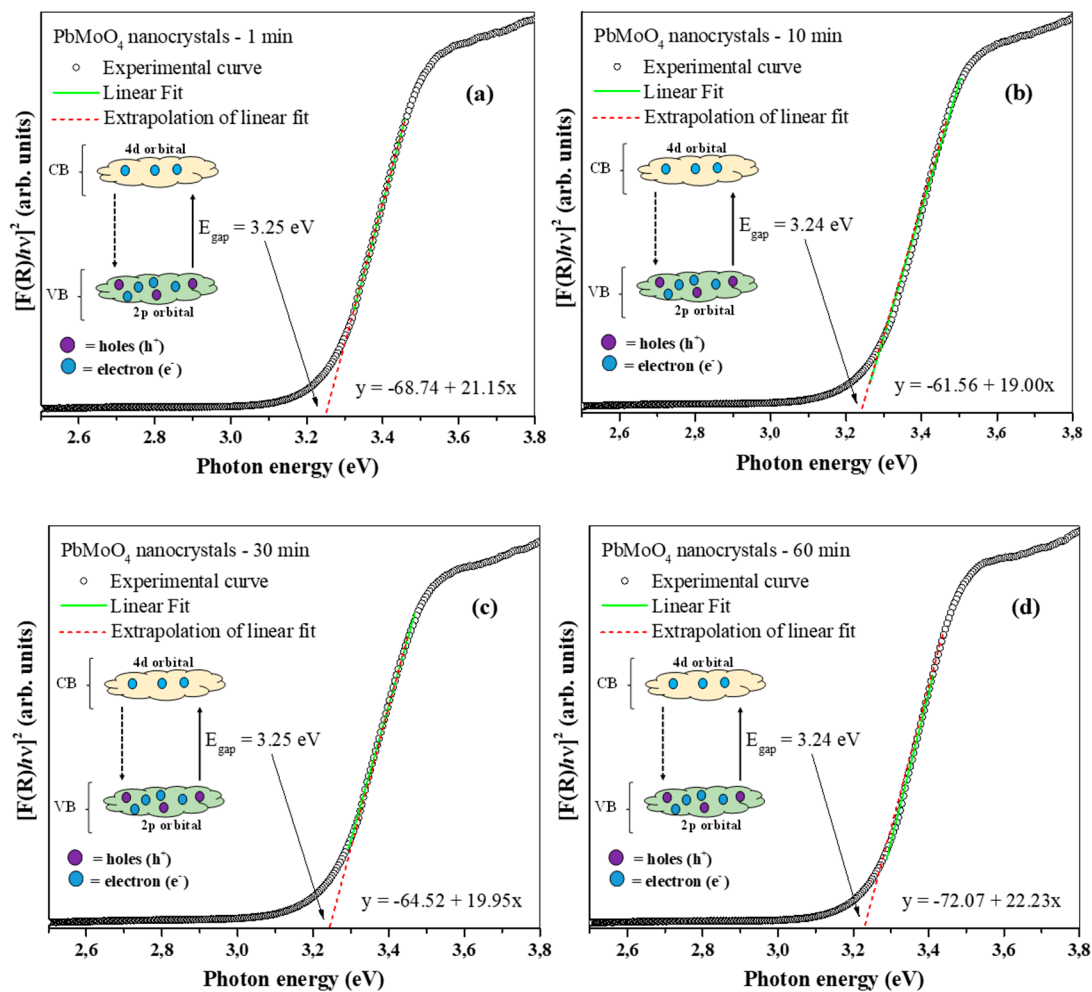

**Figure S1.** UV-vis spectra of PbMoO<sub>4</sub> nanocrystals synthesized at (a) 1 min, (b) 10 min, (c) 30 min and (d) 60 min by MH under 100 °C.



## Chapter Table

**Table S1** – Rietveld refinement results of PbMoO<sub>4</sub> nanocrystals.

| Atoms                                                                                                     | Wyckoff | Atomic coordinates |         |         |
|-----------------------------------------------------------------------------------------------------------|---------|--------------------|---------|---------|
|                                                                                                           |         | x                  | y       | z       |
| <b><u>PbMoO<sub>4</sub> – 1min</u></b>                                                                    |         |                    |         |         |
| Pb                                                                                                        | 4b      | 0                  | 0.25000 | 0.62500 |
| Mo                                                                                                        | 4a      | 0                  | 0.25000 | 0.12500 |
| O                                                                                                         | 16f     | 0.23782            | 0.12102 | 0.04177 |
| R <sub>p</sub> = 8.45; R <sub>wp</sub> = 11.0; R <sub>e</sub> = 6.16 and $\chi^2$ = 3.165 and GOF = 1.77. |         |                    |         |         |
| <b><u>PbMoO<sub>4</sub> – 10min</u></b>                                                                   |         |                    |         |         |
| Pb                                                                                                        | 4b      | 0                  | 0.25000 | 0.62500 |
| Mo                                                                                                        | 4a      | 0                  | 0.25000 | 0.12500 |
| O                                                                                                         | 16f     | 0.23634            | 0.11447 | 0.04513 |
| R <sub>p</sub> = 9.01; R <sub>wp</sub> = 11.5; R <sub>e</sub> = 6.97 and $\chi^2$ = 2.738 and GOF = 1.65. |         |                    |         |         |
| <b><u>PbMoO<sub>4</sub> – 30min</u></b>                                                                   |         |                    |         |         |
| Pb                                                                                                        | 4b      | 0                  | 0.25000 | 0.62500 |
| Mo                                                                                                        | 4a      | 0                  | 0.25000 | 0.12500 |
| O                                                                                                         | 16f     | 0.23904            | 0.11805 | 0.04590 |
| R <sub>p</sub> = 10.0; R <sub>wp</sub> = 12.5; R <sub>e</sub> = 7.28 and $\chi^2$ = 2.960 and GOF = 1.72. |         |                    |         |         |
| <b><u>PbMoO<sub>4</sub> – 60min</u></b>                                                                   |         |                    |         |         |
| Pb                                                                                                        | 4b      | 0                  | 0.25000 | 0.62500 |
| Mo                                                                                                        | 4a      | 0                  | 0.25000 | 0.12500 |
| O                                                                                                         | 16f     | 0.23963            | 0.11430 | 0.05048 |
| R <sub>p</sub> = 9.94; R <sub>wp</sub> = 12.1; R <sub>e</sub> = 7.36 and $\chi^2$ = 2.706 and GOF = 1.64. |         |                    |         |         |

**Table S2.** Experimental and theoretical Raman active modes of PbMoO<sub>4</sub> nanocrystals synthesized and reported by literatures.

| Assignment           | This work                           |                                    | Moura et al. (2018)<br>(cm <sup>-1</sup> ) | Bomio et al. (2013)<br>(cm <sup>-1</sup> ) |
|----------------------|-------------------------------------|------------------------------------|--------------------------------------------|--------------------------------------------|
|                      | Experimental<br>(cm <sup>-1</sup> ) | Theoretical<br>(cm <sup>-1</sup> ) |                                            |                                            |
| <i>E<sub>g</sub></i> | 60                                  | 62.2                               | -                                          | -                                          |
| <i>B<sub>g</sub></i> |                                     | 63.2                               | 62                                         | 65                                         |
| <i>B<sub>g</sub></i> | 71                                  | 84.9                               | 73                                         | 75                                         |
| <i>E<sub>g</sub></i> | 101                                 | 130.6                              | 104                                        | 107                                        |
| <i>A<sub>g</sub></i> | 165                                 | 197.0                              | 168                                        | 171                                        |
| <i>E<sub>g</sub></i> | 192                                 | 217.8                              | 193                                        | 195                                        |
| <i>B<sub>g</sub></i> | 315                                 | 319.8                              | 318                                        | 320                                        |
| <i>A<sub>g</sub></i> |                                     | 324.9                              | -                                          | -                                          |
| <i>E<sub>g</sub></i> | 352                                 | 373.7                              | -                                          | -                                          |
| <i>B<sub>g</sub></i> |                                     | 377.3                              | 351                                        | 351                                        |
| <i>E<sub>g</sub></i> | 744                                 | 769.7                              | 743                                        | 743                                        |
| <i>B<sub>g</sub></i> | 765                                 | 788.7                              | 766                                        | 766                                        |
| <i>A<sub>g</sub></i> | 867                                 | 880.7                              | 869                                        | 872                                        |

**Table S3.** Lattice parameters (Å and Å<sup>3</sup>), total energy differences per unit cell (eV), and electronic band gap (eV) of stoichiometric and reduced PbMoO<sub>4</sub>.

| Structure / State <sup>(a)</sup>                                   | <i>a</i> | <i>b</i> | <i>c</i> | <i>V</i> | ΔE/cell |
|--------------------------------------------------------------------|----------|----------|----------|----------|---------|
| Stoichiometric system                                              |          |          |          |          |         |
| Ground S0 (fully relaxed) - reference                              | 5.4168   | 5.4168   | 11.8200  | 346.82   | 0.00    |
| Triplet T1 (frozen from ground S0) - delocalized                   |          |          |          |          | 0.33    |
| Triplet T1 (atomic positions relaxed from S0 structure)            |          |          |          |          | 0.34    |
| Triplet T1 (symmetry broken, lattice frozen from S0)               |          |          |          |          | 0.10    |
| Triplet T1 (symmetry broken, fully relaxed) <sup>(b)</sup>         | 5.2567   | 5.2591   | 11.5729  | 319.94   | 0.09    |
| Ground S0 (electronic structure from full relaxed T1)              |          |          |          |          | 0.03    |
| Reduced system                                                     |          |          |          |          |         |
| VO (S0, frozen from stoichiometric bulk) - reference               | 5.4168   | 5.4168   | 11.8200  | 346.82   | 0.00    |
| VO (T1, frozen from stoichiometric bulk)                           |          |          |          |          | 0.02    |
| VO (T1, atomic positions and lattice fully relaxed) <sup>(c)</sup> | 5.4996   | 5.3398   | 11.8164  | 346.95   | -0.02   |

| Experimental parameters      |        |        |         |        |   |
|------------------------------|--------|--------|---------|--------|---|
| Experimental, single crystal | 5.4312 | 5.4312 | 12.1065 | 357.12 | - |
| Experimental, this work      | 5.4332 | 5.4332 | 12.1027 | 357.28 | - |

**Legend:** (a) S for singlet (diamagnetic), T for triplet (ferromagnetic); (b)  $\alpha = \beta = 90^\circ$ ;  $\gamma = 89.87^\circ$ ; (c)  $\alpha = 90.65^\circ$ ;  $\beta = 90.24^\circ$ ;  $\gamma = 90.89^\circ$ .
